# Supplementary material for: Assessment of Tyrosine Kinase Inhibitors and Survival and Cardiovascular Outcomes of Patients With Non–Small Cell Lung Cancer in Taiwan
Source: PubMed Central journal article supplement (PMC10193184; doi:10.1001/jamanetworkopen.2023.13824), 2023-05-17

## Supplemental Online Content

Chang WT, Lin HW, Chang TC, Lin SH, Li YH. Assessment of tyrosine kinase inhibitors and survival and cardiovascular outcomes of patients with non–small cell lung cancer in Taiwan. *JAMA Netw Open*. 2023;6(5):e2313824.  
doi:10.1001/jamanetworkopen.2023.13824

**eTable 1.** ICD-9 and ICD-10 Codes

**eTable 2.** The Details of Anti-Arrhythmia and Anti-Cancer Drugs of Patients With Non-Small Cell Lung Cancers (NSCLC) Treated With or Without Tyrosine Kinase Inhibitors (TKIs) After Propensity Score Matching

**eTable 3.** The Event Numbers of Patients With Non-Small Cell Lung Cancers (NSCLC) Treated With or Without Tyrosine Kinase Inhibitors (TKIs)

**eTable 4.** The Crude and Adjusted Hazard Ratio (HR) of Patients With Non-Small Cell Lung Cancer (NSCLC) Treated With or Without TKIs

**eTable 5.** The Reasons of Death of Patients With Non-Small Cell Lung Cancers (NSCLC) Treated With or Without Tyrosine Kinase Inhibitors (TKIs)

**eTable 6.** The Baseline Characteristics of Patients With Non-Small Cell Lung Cancers (NSCLC) Treated With Different Tyrosine Kinase Inhibitors Including Erlotinib, Gefitinib and Afatinib After Propensity Score Matching

**eTable 7.** The Crude and Adjusted Subdistribution Hazard Ratio (sHR) of Major Adverse Cardiac and Cerebrovascular Events (MACCEs) in Patients With Non-Small Cell Lung Cancers (NSCLC) Treated With Different Tyrosine Kinase Inhibitors

**eTable 8.** The Reason of Death of Patients With Non-Small Cell Lung Cancers (NSCLC) Treated With Different Tyrosine Kinase Inhibitors

**eFigure.** The Flowchart of Study Design

This supplemental material has been provided by the authors to give readers additional information about their work.

eTable 1. ICD-9 and ICD-10 codes

| Disease                               | ICD-9 Codes                                                                         | ICD-10 Codes                                                                                                                                                                                                        |
|---------------------------------------|-------------------------------------------------------------------------------------|---------------------------------------------------------------------------------------------------------------------------------------------------------------------------------------------------------------------|
| Lung cancer                           | 162                                                                                 | C34                                                                                                                                                                                                                 |
| Outcome                               |                                                                                     |                                                                                                                                                                                                                     |
| Acute myocardial infarction           | 410                                                                                 | I21, I22, I23                                                                                                                                                                                                       |
| Heart failure                         | 428, 402.01, 402.11, 402.91, 404.01, 404.03, 404.11, 404.13, 404.91, 404.93, 785.51 | I11.0, I13.0, I13.2, I42.0, I42.1, I42.2, I42.3, I42.4, I42.5, I42.6, I42.7, I42.8, I42.9, I43, I50.1, I50.20, I50.21, I50.22, I50.23, I50.30, I50.31, I50.32, I50.33, I50.40, I50.41, I50.42, I50.43, I50.9, R57.0 |
| Ischemic stroke (including TIA)       | 433, 434, 435, 436                                                                  | I63, I65, I66, I67.89, I67.84, G45.0, G45.1, G45.2, G45.8, G45.9, G46.0, G46.1, G46.2                                                                                                                               |
| Comorbidities                         |                                                                                     |                                                                                                                                                                                                                     |
| Coronary artery disease               | 410, 411, 412, 413, 414                                                             | I20, I21, I22, I24, I25                                                                                                                                                                                             |
| Peripheral artery disease             | 440, 443, 444, 447.8, 447.9                                                         | I70.2-I70.9, I71, I73.9, I74.2, I74.3, I74.4, I74.5, I77.89, I77.9                                                                                                                                                  |
| Hypertension                          | 401, 402, 403, 404, 405                                                             | I10, I11.0, I11.9, I12.0, I12.9, I13.0, I13.2, I13.11, I15, N26.2                                                                                                                                                   |
| Diabetes mellitus                     | 250                                                                                 | E08, E09, E11, E13                                                                                                                                                                                                  |
| Hyperlipidemia                        | 272                                                                                 | E78                                                                                                                                                                                                                 |
| Valve disorders                       | 394-397, 424.0, 424.1, 424.2, 424.3                                                 | I05, I06, I07, I08, I09, I34-I37                                                                                                                                                                                    |
| Chronic obstructive pulmonary disease | 491, 492, 494, 495, 496                                                             | J41, J42, J43, J44, J47, J67                                                                                                                                                                                        |
| Asthma                                | 493                                                                                 | J45                                                                                                                                                                                                                 |
| Atrial fibrillation                   | 427.31, 427.32                                                                      | I48                                                                                                                                                                                                                 |
| Chronic kidney disease                | 580-589, 403, 404, 585, V45.1, V56                                                  | I12, I13, N02, N03, N04, N05, N06, N07, N08, N11, N14, N17, N18, N19, N29, O10.2, O10.3, Q61, Z49,                                                                                                                  |

|                |                                                                                     |              |
|----------------|-------------------------------------------------------------------------------------|--------------|
|                |                                                                                     | Z99.2        |
| ESRD           | 585                                                                                 | N18.6; Z99.2 |
| Procedure Code |                                                                                     |              |
| Radiotherapy   | V58.0                                                                               | Z51.0        |
| Operations     | 67023B (single lobectomy), 67042B(Bilobectomy), 67050B<br>(Thoracoscopic Lobectomy) |              |

eTable 2. The details of anti-arrhythmia and anti-cancer drugs of patients with non-small cell lung cancers (NSCLC) treated with or without tyrosine kinase inhibitors (TKIs) after propensity score matching.

|                              | Total<br>N=48258 | TKI users<br>N=24129 | TKI non-users<br>N=24129 | ASMD  |
|------------------------------|------------------|----------------------|--------------------------|-------|
| <b>Anti-arrhythmia drugs</b> |                  |                      |                          |       |
| Amiodarone                   | 931 (1.93)       | 454 (1.88)           | 477 (1.98)               | 0.007 |
| Dronedarone                  | 33 (0.07)        | 23 (0.10)            | 10 (0.04)                | 0.02  |
| Propafenone                  | 206 (0.43)       | 107 (0.44)           | 99 (0.41)                | 0.005 |
| Flecainide                   |                  | 11 (0.02)            |                          | 0.02  |
| Quinidine                    | 22 (0.05)        | 11 (0.05)            | 11 (0.05)                | 0.000 |
| Procainamide                 |                  | 0 (0.00)             |                          |       |
| <b>Anti-cancer drugs</b>     |                  |                      |                          |       |
| Gemcitabine                  | 2361 (4.89)      | 1160 (4.81)          | 1201 (4.98)              | 0.008 |
| Taxanes                      | 2913 (6.04)      | 1565 (6.49)          | 1348 (5.59)              | 0.04  |
| Docetaxel                    | 2215 (4.59)      | 1249 (5.18)          | 966 (4.00)               | 0.06  |
| Paclitaxel                   | 764 (1.58)       | 353 (1.46)           | 411 (1.70)               | 0.02  |
| Vinorelbine                  | 3335 (6.91)      | 1620 (6.71)          | 1715 (7.11)              | 0.02  |
| Pemetrexed                   | 3520 (7.29)      | 2025 (8.39)          | 1495 (6.20)              | 0.09  |
| Irinotecan                   |                  | 20 (0.041)           |                          | 0.03  |
| Avastin                      | 10 (0.02)        | 3 (0.01)             | 7 (0.03)                 | 0.01  |

Abbreviation as listed in Table 1

eTable 3. The event numbers of patients with non-small cell lung cancers (NSCLC) treated with or without tyrosine kinase inhibitors (TKIs)

|                             | Total<br>N=48258 | TKI users<br>N=24129 | TKI non-users (Ref)<br>N=24129 |
|-----------------------------|------------------|----------------------|--------------------------------|
| All cause death             | 37796 (78.32)    | 19338 (80.14)        | 18458 (76.50)                  |
| MACCEs                      | 5278 (10.94)     | 2848 (11.80)         | 2430 (10.07)                   |
| Heart failure               | 2443 (5.06)      | 1262 (5.23)          | 1181 (4.89)                    |
| Acute myocardial infarction | 511 (1.06)       | 283 (1.17)           | 228 (0.94)                     |
| Ischemic stroke             | 2822 (5.85)      | 1596 (6.61)          | 1226 (5.08)                    |

Abbreviation as listed in Table 1

eTable 4. The crude and adjusted hazard ratio (HR) of patients with non-small cell lung cancer (NSCLC) treated with or without TKIs

|                             | Crude HR (95%CI) | <i>p</i> value | Adjusted HR (95%CI) | <i>p</i> value |
|-----------------------------|------------------|----------------|---------------------|----------------|
| All cause death             | 0.90 (0.88-0.92) | <0.001         | 0.76 (0.75-0.78)    | <0.001         |
| MACCEs                      | 1.01 (0.95-1.06) | 0.83           | 0.97 (0.92-1.03)    | 0.31           |
| Heart failure               | 0.92 (0.85-0.99) | 0.04           | 0.87 (0.80-0.94)    | <0.001         |
| Acute myocardial infarction | 1.07 (0.90-1.27) | 0.46           | 1.00 (0.84-1.20)    | 0.97           |
| Ischemic stroke             | 1.12 (1.04-1.20) | 0.004          | 1.10 (1.02-1.18)    | 0.02           |

TKI non-users are references.

Model was adjusted for age, sex, stage, therapies use during (radiotherapy, operation, anti-arrhythmia drugs, anti-cancer drugs, platinum analogues), CV medication (ACEI/ARB, beta blocker, anti-platelet agents, anti-coagulants, statins, digoxin, MRA) and comorbidities (coronary artery disease, peripheral artery disease, hypertension, diabetes mellitus, hyperlipidemia, valve disease, chronic obstructive lung disease, asthma, chronic kidney disease, ESRD).

HR= hazard ratio.

eTable 5. The reasons of death of patients with non-small cell lung cancers (NSCLC) treated with or without tyrosine kinase inhibitors (TKIs)

|              | Total<br>N=48258 | TKI users<br>N=24129 | TKI non-users<br>N=24129 |
|--------------|------------------|----------------------|--------------------------|
| Cancer death | 33632 (69.69)    | 17357 (71.93)        | 16275 (67.45)            |
| CV death     | 221 (0.46)       | 100 (0.41)           | 121 (0.50)               |
| Others       | 3943 (8.17)      | 1881 (7.80)          | 2062 (8.55)              |

Abbreviation as listed in Table 1

eTable 6. The baseline characteristics of patients with non-small cell lung cancers (NSCLC) treated with different tyrosine kinase inhibitors including Erlotinib, Gefitinib and Afatinib after propensity score matching.

|                        | Total   |         | Erlotinib user |         | Gefitinib user |         | Afatinib user |         | ASMD   |        |        |
|------------------------|---------|---------|----------------|---------|----------------|---------|---------------|---------|--------|--------|--------|
|                        | N=12666 |         | N=4222         |         | N=4222         |         | N=4222        |         | E vs G | G vs A | E vs A |
| Age                    |         |         |                |         |                |         |               |         | 0.15   | 0.42   | 0.27   |
| Mean (SD)              | 67.34   | (11.44) | 67.75          | (11.08) | 69.50          | (11.82) | 64.77         | (10.90) |        |        |        |
| Median (IQR)           | 67.00   | (16.00) | 67.00          | (16.00) | 70.00          | (18.00) | 64.00         | (16.00) |        |        |        |
| Sex                    |         |         |                |         |                |         |               |         | 0.11   | 0.14   | 0.03   |
| Male                   | 4759    | (37.57) | 1639           | (38.82) | 1418           | (33.59) | 1702          | (40.31) |        |        |        |
| Female                 | 7907    | (62.43) | 2583           | (61.18) | 2804           | (66.41) | 2520          | (59.69) |        |        |        |
| Therapies for cancer   |         |         |                |         |                |         |               |         |        |        |        |
| Radiotherapy           | 284     | (2.24)  | 114            | (2.70)  | 92             | (2.18)  | 78            | (1.85)  | 0.03   | 0.02   | 0.06   |
| Operations (lobectomy) | 643     | (5.08)  | 185            | (4.38)  | 235            | (5.57)  | 223           | (5.28)  | 0.06   | 0.01   | 0.04   |
| Anti-cancer drugs      | 1191    | (9.40)  | 425            | (10.07) | 433            | (10.26) | 333           | (7.89)  | 0.006  | 0.08   | 0.08   |
| platinum analogues     | 467     | (3.69)  | 151            | (3.58)  | 156            | (3.69)  | 160           | (3.79)  | 0.006  | 0.005  | 0.01   |
| CV medications         |         |         |                |         |                |         |               |         |        |        |        |
| ACEI/ARB               | 3656    | (28.86) | 1191           | (28.21) | 1301           | (30.81) | 1164          | (27.57) | 0.06   | 0.07   | 0.01   |
| Beta blocker           | 2808    | (22.17) | 930            | (22.03) | 948            | (22.45) | 930           | (22.03) | 0.01   | 0.01   | 0.000  |
| Anti-platelet agents   | 1899    | (14.99) | 633            | (14.99) | 689            | (16.32) | 577           | (13.67) | 0.04   | 0.07   | 0.04   |
| Anti-coagulants        | 426     | (3.36)  | 149            | (3.53)  | 166            | (3.93)  | 111           | (2.63)  | 0.02   | 0.07   | 0.05   |
| Statins                | 2257    | (17.82) | 722            | (17.10) | 799            | (18.92) | 736           | (17.43) | 0.05   | 0.04   | 0.009  |
| Digoxin                | 128     | (1.01)  | 46             | (1.09)  | 42             | (0.99)  | 40            | (0.95)  | 0.009  | 0.005  | 0.01   |



|                                  |              |              |              |              |       |       |      |
|----------------------------------|--------------|--------------|--------------|--------------|-------|-------|------|
| MRA                              | 447 (3.53)   | 165 (3.91)   | 168 (3.98)   | 114 (2.70)   | 0.004 | 0.07  | 0.07 |
| Anti-arrhythmia drugs            | 296 (2.34)   | 95 (2.25)    | 113 (2.68)   | 88 (2.08)    | 0.03  | 0.04  | 0.01 |
| Comorbidities                    |              |              |              |              |       |       |      |
| Coronary artery disease          | 1393 (11.00) | 454 (10.75)  | 503 (11.91)  | 436 (10.33)  | 0.04  | 0.05  | 0.01 |
| Peripheral artery disease        | 238 (1.88)   | 80 (1.89)    | 89 (2.11)    | 69 (1.63)    | 0.02  | 0.04  | 0.02 |
| Hypertension                     | 5610 (44.29) | 1820 (43.11) | 1999 (47.35) | 1791 (42.42) | 0.09  | 0.10  | 0.01 |
| Diabetes mellitus                | 2633 (20.79) | 884 (20.94)  | 941 (22.29)  | 808 (19.14)  | 0.03  | 0.08  | 0.05 |
| Hyperlipidemia                   | 3023 (23.87) | 974 (23.07)  | 1055 (24.99) | 994 (23.54)  | 0.05  | 0.03  | 0.01 |
| Valve disease                    | 367 (2.90)   | 127 (3.01)   | 136 (3.22)   | 104 (2.46)   | 0.01  | 0.05  | 0.03 |
| Chronic obstructive lung disease | 2201 (17.38) | 761 (18.02)  | 737 (17.46)  | 703 (16.65)  | 0.01  | 0.02  | 0.04 |
| Asthma                           | 975 (7.70)   | 312 (7.39)   | 335 (7.39)   | 328 (7.77)   | 0.02  | 0.006 | 0.01 |
| Chronic kidney disease           | 1100 (8.68)  | 372 (8.81)   | 411 (9.73)   | 317 (7.51)   | 0.03  | 0.08  | 0.05 |
| ESRD                             | 14 (0.11)    | 5 (0.12)     |              | 9            | 0.01  | 0.04  | 0.03 |

ASMD= absolute standardized mean difference; CV=cardiovascular; ACEI/ARB= angiotensin-converting enzyme inhibitor/Angiotensin Receptor Blocker; MRA= mineralocorticoid-receptor antagonists; ESRD=end-stage renal disease.

Abbreviation as listed in Table 1

eTable 7. The crude and adjusted subdistribution hazard ratio (sHR) of major adverse cardiac and cerebrovascular events (MACCEs) in patients with non-small cell lung cancers (NSCLC) treated with different tyrosine kinase inhibitors.

|                             |           | Crude sHR (95%CI) | <i>p</i> value | Adjusted sHR (95%CI) | <i>p</i> value |
|-----------------------------|-----------|-------------------|----------------|----------------------|----------------|
| MACCEs                      | Erlotinib | 0.91 (0.80-1.02)  | 0.11           | 0.98 (0.86-1.10)     | 0.70           |
|                             | Afatinib  | 0.84 (0.74-0.95)  | 0.004          | 1.01 (0.89-1.15)     | 0.83           |
| Heart failure               | Erlotinib | 0.88 (0.73-1.05)  | 0.17           | 0.99 (0.82-1.19)     | 0.88           |
|                             | Afatinib  | 0.78 (0.64-0.94)  | 0.008          | 1.06 (0.87-1.29)     | 0.57           |
| Acute myocardial infarction | Erlotinib | 0.80 (0.55-1.17)  | 0.25           | 0.92 (0.63-1.34)     | 0.65           |
|                             | Afatinib  | 0.65 (0.44-0.97)  | 0.04           | 0.86 (0.57-1.31)     | 0.50           |
| Ischemic stroke             | Erlotinib | 0.92 (0.78-1.08)  | 0.30           | 0.96 (0.82-1.13)     | 0.64           |
|                             | Afatinib  | 0.85 (0.73-1.01)  | 0.06           | 0.95 (0.80-1.12)     | 0.52           |

Model was adjusted for age, sex, stage, therapies use during (radiotherapy, operation, anti-arrhythmia drugs, anti-cancer drugs, platinum analogues), CV medication (ACEI/ARB, beta blocker, anti-platelet agents, anti-coagulants, statins, digoxin, MRA) and comorbidities (coronary artery disease, peripheral artery disease, hypertension, diabetes mellitus, hyperlipidemia, valve disease, chronic obstructive lung disease, asthma, chronic kidney disease, ESRD).

sHR = subdistribution hazard ratio.

Abbreviation as listed in Table 1

eTable 8. The reason of death of patients with non-small cell lung cancers (NSCLC) treated with different tyrosine kinase inhibitors

|              | Total<br>N=12666 | Erlotinib user<br>N=4222 | Gefitinib user<br>N=4222 | Afatinib user<br>N=4222 |
|--------------|------------------|--------------------------|--------------------------|-------------------------|
| Cancer death | 7889 (62.28)     | 2788 (66.04)             | 2620 (62.06)             | 2481 (58.76)            |
| CV death     | 55 (0.43)        | 21 (0.50)                | 23 (0.54)                | 11 (0.26)               |
| Others       | 800 (6.32)       | 256 (6.06)               | 273 (6.47)               | 271 (6.42)              |

Abbreviation as listed in Table 1

eFigure 1. The flowchart of study design

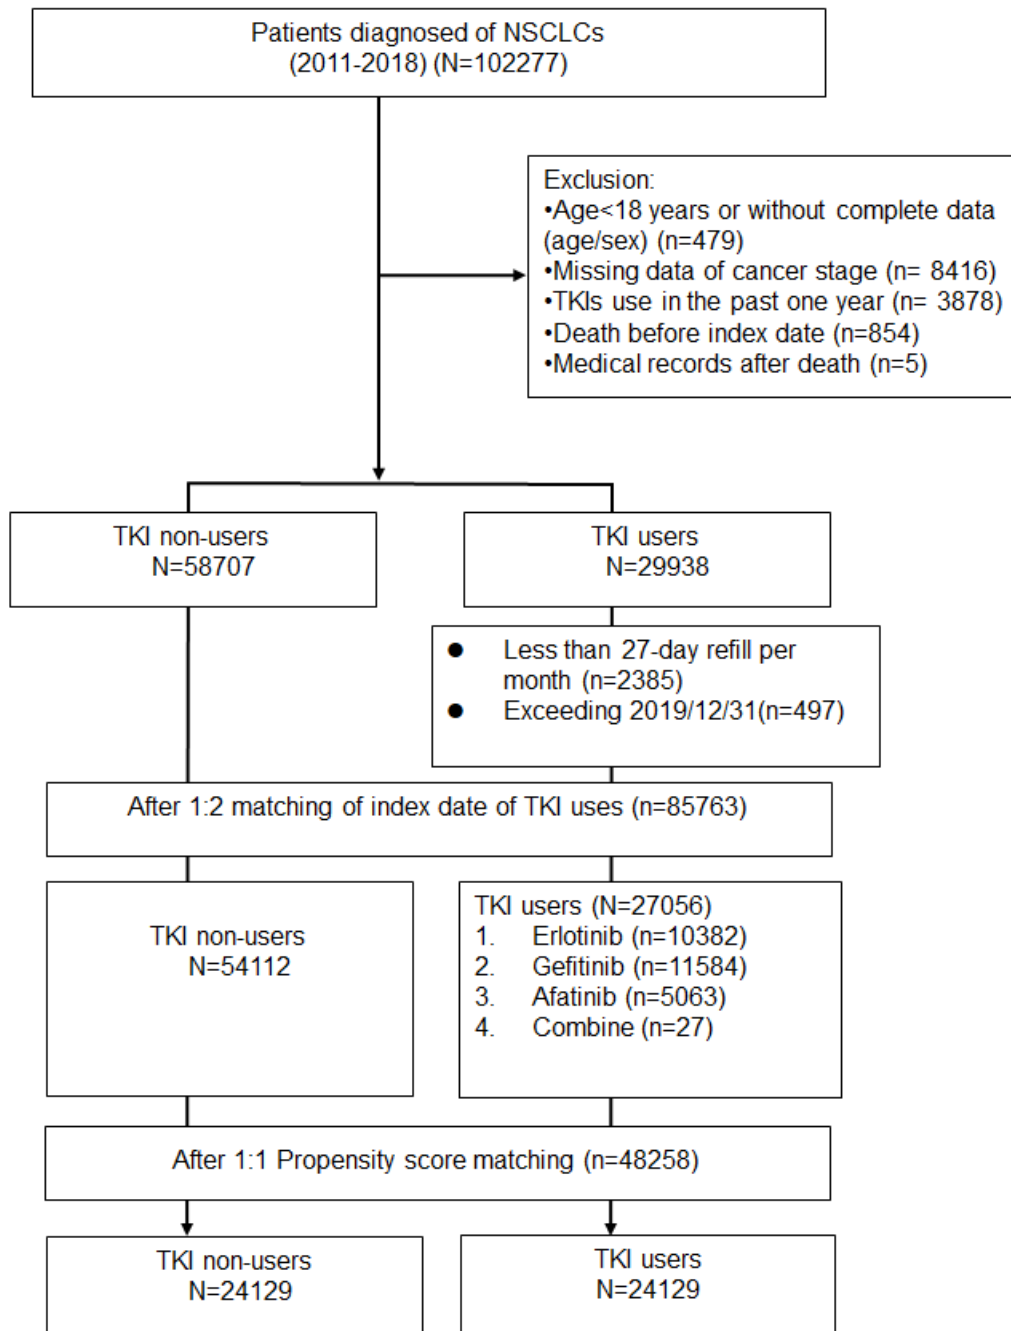

Supplement: jamanetwopen-e2313824-s001.pdf [file jamanetwopen-e2313824-s001.pdf]
